# Supplementary material
Source: PubMed Central journal article supplement (PMC3364749)
Supplement: emboj201288s1.pdf [file emboj201288s1.pdf]

Liu *et al.* Supplementary Table S1

|    | <b>Inhibitor</b>  | <b>Target kinase</b> | <b>working concentration</b> | <b>Supplier</b>   |
|----|-------------------|----------------------|------------------------------|-------------------|
| 1  | SB20219           | p38                  | 10 $\mu$ M                   | CALBIOCHEM        |
| 2  | PD98059           | MEK1                 | 50 $\mu$ M                   | CALBIOCHEM        |
| 3  | LY294002          | PI3K                 | 50 $\mu$ M                   | CALBIOCHEM        |
| 4  | Calphostin C      | PKC                  | 0.25 $\mu$ M                 | CALBIOCHEM        |
| 5  | GF 109203X        | PKC                  | 0.1 $\mu$ M                  | CALBIOCHEM        |
| 6  | Staurosporine     | PKC                  | 0.1 $\mu$ M                  | CALBIOCHEM        |
| 7  | RO-3306           | Cdk1                 | 20 $\mu$ M                   | CALBIOCHEM        |
| 8  | W-7               | CaMKII               | 50 $\mu$ M                   | CALBIOCHEM        |
| 9  | SB216763          | GSK3 $\beta$         | 10 $\mu$ M                   | Tocris bioscience |
| 10 | SB218078          | Chk1                 | 10 $\mu$ M                   | CALBIOCHEM        |
| 11 | Chk2 inhibitor II | Chk2                 | 10 $\mu$ M                   | CALBIOCHEM        |
| 12 | Rottlerin         | PKC                  | 5 $\mu$ M                    | CALBIOCHEM        |
| 13 | Caffeine          | ATM/ATR              | 5mM                          | Sigma             |

Supplementary Table S1. Protein kinase inhibitors used in this study.

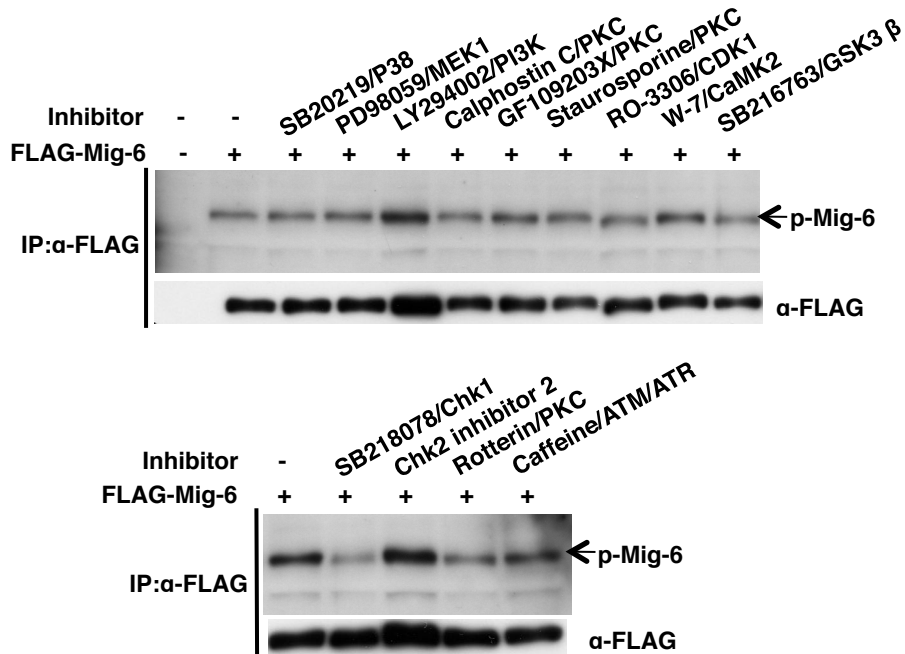

**Supplementary Figure S1. Effects of protein kinase inhibitors on Mig-6 phosphorylation *in vivo*.**

HEK293 cells were transfected with FLAG-Mig-6 and treated with the indicated kinase inhibitors for 3 h before harvesting. FLAG-Mig-6 was immunoprecipitated with anti-FLAG antibody from the cell lysates and p-Mig-6 was detected by the Phos-tag biotin system. Details of the kinase inhibitors are indicated in Supplementary Table 1.

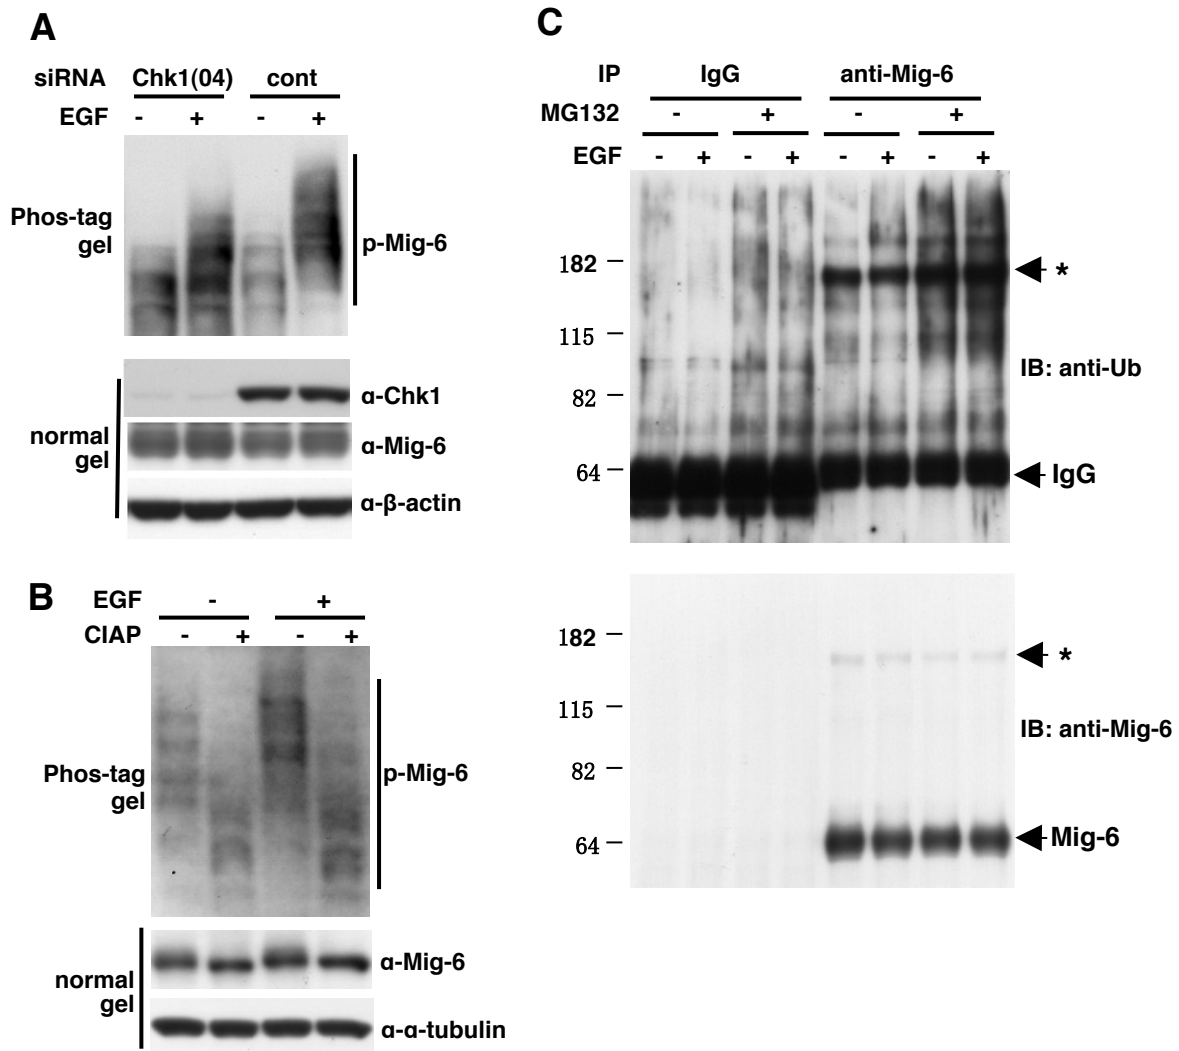

**Supplementary Figure S2. EGF-promoted phosphorylation of Mig-6 is suppressed by Chk1 depletion.**

**A.** MDA-MB-231 cells were transfected with another siRNA oligo, *Chk1(04)*. Quiescence was induced by 16 h serum starvation, and then the cells were stimulated with 20 ng/ml EGF for 15 min. Cell lysates were separated by 6% Phos-tag SDS-PAGE or normal SDS-PAGE and analyzed by immunoblotting with the indicated antibodies. **B.** MDA-MB-231 cells were made quiescent by 16 h serum starvation, and then stimulated with 20 ng/ml EGF for 15 min. Cell lysates were incubated in 20  $\mu$ l 0.05 mM of Tris-HCl (PH 8.0), with or without 1 unit Calf Intestine Alkaline Phosphatase (CIAP) at 37°C for 30 min. The reaction was stopped by the addition of SDS sample buffer and then the proteins were separated by Phos-tag SDS-PAGE or normal SDS-PAGE followed by immunoblotting. **C.** MDA-MB-231 cells were made quiescent by 16 h serum starvation, pretreated with or without 10  $\mu$ M MG132 for 5 h, then stimulated with 20 ng/ml EGF for 15 min. Mig-6 was immunoprecipitated with anti-Mig-6 antibody and then immunoblotted with anti-ubiquitin antibody to detect ubiquitylation of Mig-6. ( \*: nonspecific

b a n d . )



**A**

Exogenous Mig6: SHpSGPAGSFNKPAIR

$[M+3H-H_3PO_4]^{3+}$

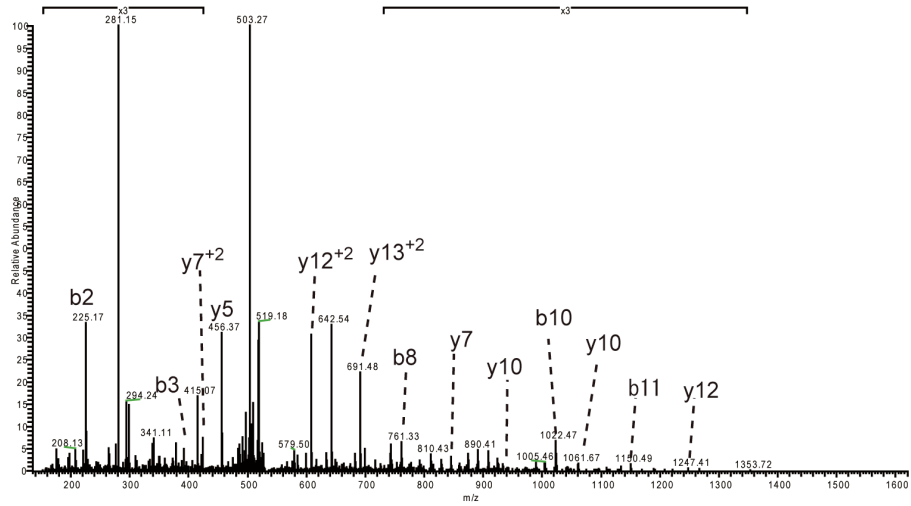

**B**

In vitro phosphorylation: SHpSGPAGSFNKPAIR

$[M+3H-H_3PO_4]^{3+}$

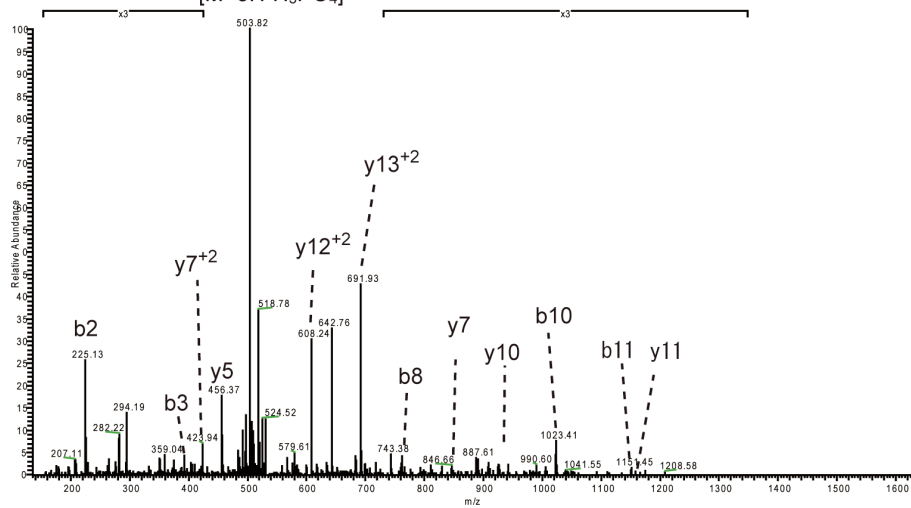

**Supplementary Figure S3. Phosphorylation status of wild-type and mutant Mig-6.**

**A.** *In vitro* phosphorylation assays of mutant recombinant Mig-6 proteins. Wild-type (WT) and the indicated mutant recombinant Mig-6 proteins (0.1  $\mu$ g) were incubated in 20  $\mu$ l of kinase buffer with  $^{32}$ P-labeled ATP and 0.1  $\mu$ g of purified recombinant GST-Chk1 kinase at 30°C for 30 min. The reaction was stopped by the addition of SDS sample buffer and then the proteins were separated by SDS-PAGE. Phosphorylated Mig-6 was analyzed by  $^{32}$ P-autoradiography or immunoblotting (IB) with anti-phospho-serine antibody. **B.** Comparison of the phosphorylation status between wild-type and mutant Mig-6 in HEK293 cells. HEK293 cells were transfected with wild-type or the indicated mutant FLAG-Mig-6. After 48 h, cells were harvested, and the cell lysates were separated by 6% Phos-tag SDS-PAGE (upper panel) or normal SDS-PAGE and immunoblotted.

**Supplementary Figure S4. Analysis of Mig-6 phosphorylation sites.**

**A.** Identification of S251 phosphorylation of exogenous Mig-6 using MS. HEK293 cells were transfected with FLAG-Mig-6, quiescence was induced by 16 h serum starvation, then the cells were treated with 20 ng/ml EGF for 15 min. FLAG-Mig-6 was immunoprecipitated with anti-FLAG antibody from the lysate and was resolved by SDS-PAGE. After tryptic digestion of the FLAG-Mig-6 band, the phosphorylated peptides were analyzed by LC-MS. The spectrum of the charged ion ( $m/z$  503.27) shows that S251 is phosphorylated in the indicated peptide. **B.** Identification of S251 phosphorylation of recombinant Mig-6 using MS. Recombinant Mig-6 protein (0.1  $\mu$ g) was incubated in 20  $\mu$ l of kinase buffer with  $^{32}$ P-labeled ATP and 0.1  $\mu$ g of purified recombinant GST-Chk1 kinase at 30°C for 30 min. The reaction was stopped by the addition of SDS sample buffer, then the proteins were separated by SDS-PAGE, followed by tryptic digestion and LC-MS. The spectrum of the charged ion ( $m/z$  503.82) shows that S251 is phosphorylated in the indicated peptide. b ions, fragmentation ions containing the amino terminus of the peptide; y ions, fragmentation ions containing the carboxy terminus of the peptide.

**A**

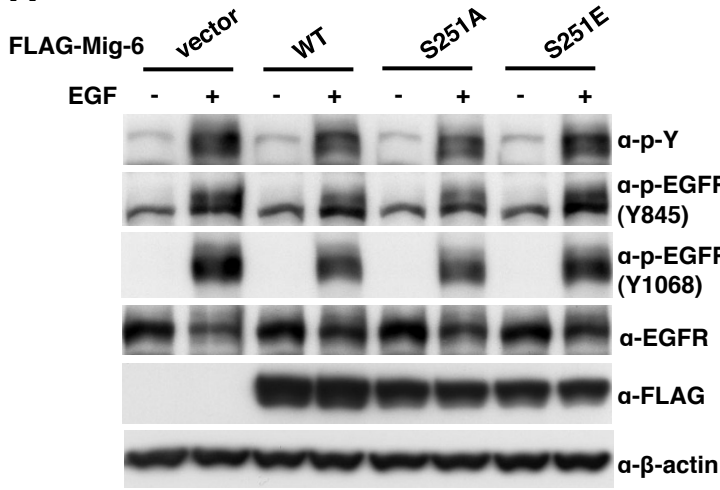

**B**

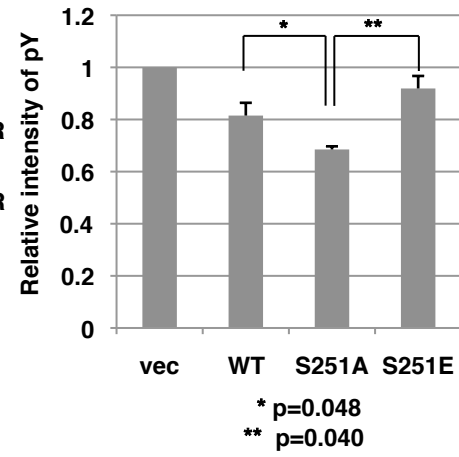

**C**

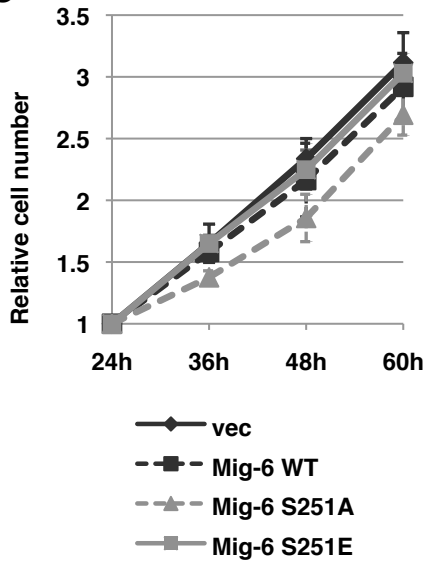

**D**

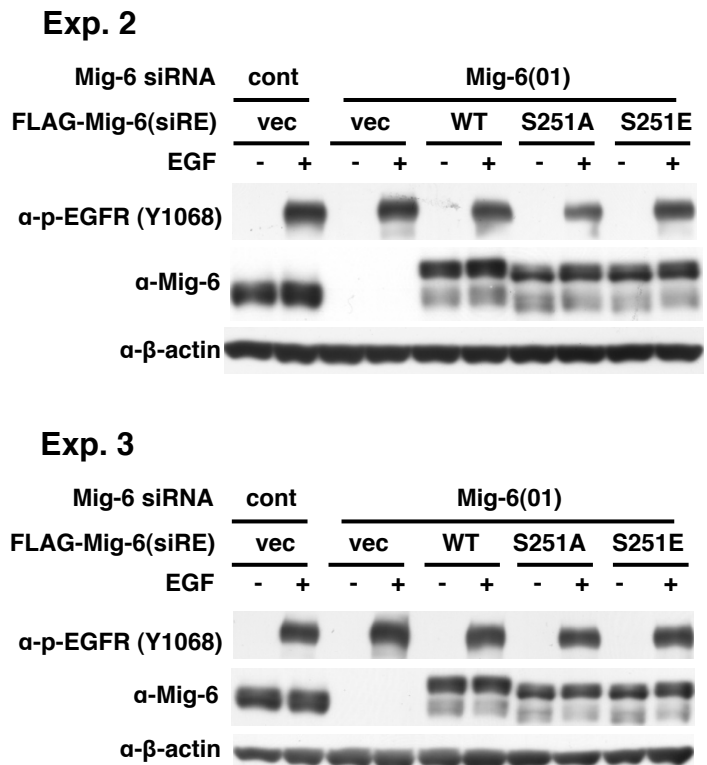

**Supplementary Figure S5. Effect of Mig-6 S251 phosphorylation on EGF signaling.**

**A.** Effect of Mig-6 S251 mutation on EGF signaling in HEK 293 cells. Wild type (WT), S251A, or S251E mutant FLAG-Mig-6 was expressed in HEK293 cells. After 16 h serum starvation, cells were stimulated with 20 ng/ml EGF, then harvested 15 min later. Cell lysates were separated using SDS-PAGE followed by immunoblotting with the indicated antibodies. **B.** Intensities of the EGF-induced phospho-tyrosine of EGFR (p-Y) in (A) (lane 2, lane 4, lane 6 vs. lane 8) were quantified by image analysis. The data from triplicate experiments were evaluated statistically and are shown graphically relative to the vector only (vec). **C.** Effect of S251 status on cell growth. Wild-type, S251A, or S251E mutant FLAG-Mig-6 was transfected into HEK293 cells. The cell growth was evaluated at the indicated times. Error bars indicate the standard deviation of three independent experiments. **D.** Effect of Mig-6 S251 mutation on EGF signaling in MDA-MB-231 cells. MDA-MB-231 cells were infected with retroviruses encoding Mig-6 wild type (WT), S251A, or S251E, and then transfected with an siRNA targeting *Mig-6*. After 16 h serum starvation, cells were stimulated with 20 ng/ml EGF for 15 min. Cell lysates were separated with SDS-PAGE followed by immunoblotting. The experiments were repeated 3 times and indicated in Fig 4A (Exp. 1) and the supplementary Fig S5D (Exp.2 and 3). The level of p-EGFR (Y1068) protein was measured and normalized to the level of  $\beta$ -actin. The triplicate data were statistically analyzed in Fig 4B.



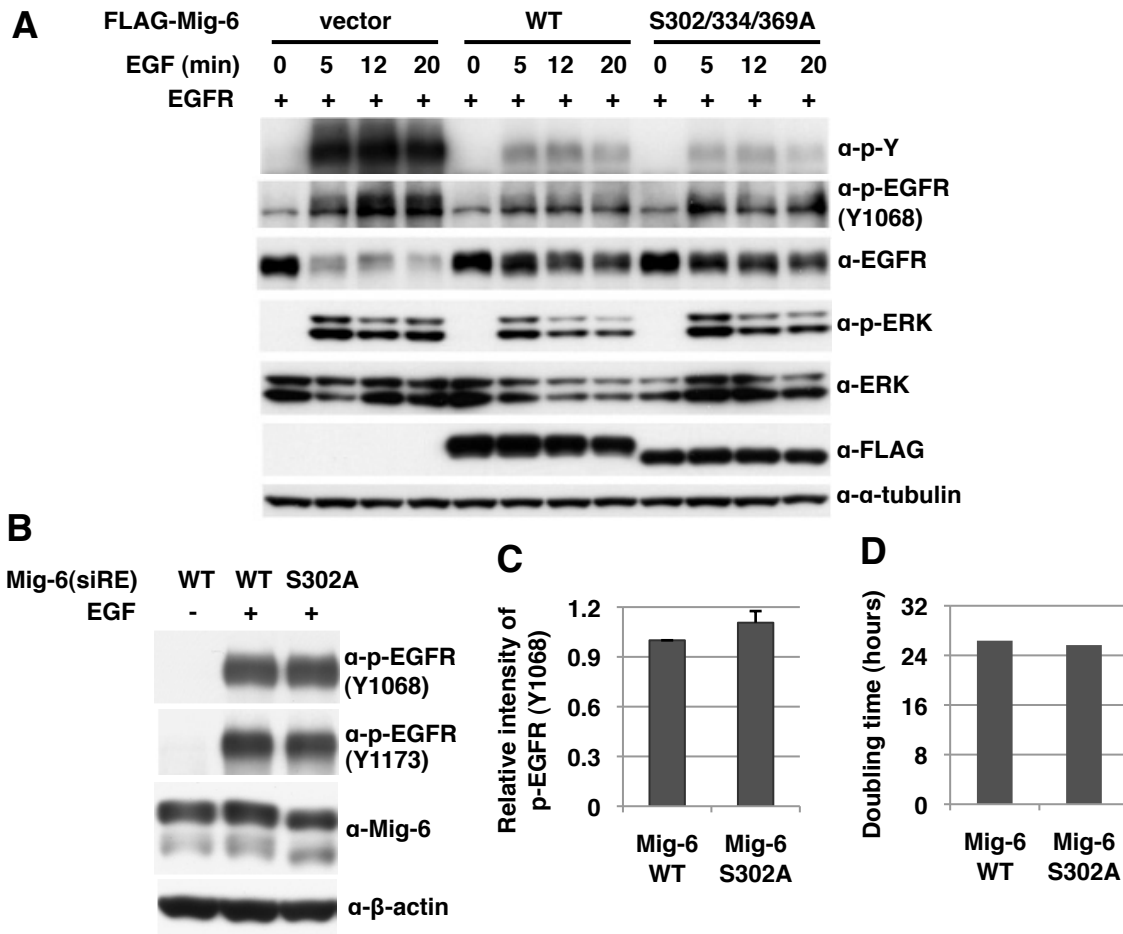

**Supplementary Figure S6. Effect of EGFR-binding domain mutations in Mig-6 on EGF signaling.**

**A.** Wild-type or S302/334/369A mutant FLAG-Mig-6 was co-expressed with EGFR in HEK293 cells. After 16 h serum starvation, cells were stimulated with 20 ng/ml EGF, then harvested at the indicated times. Cell lysates were separated by SDS-PAGE followed by immunoblotting. **B.** Effect of Mig-6 S302A mutation on EGF signaling. MDA-MB-231 cells were infected with retroviruses encoding wild type (WT), or S302A mutant Mig-6, and then transfected with an siRNA targeting *Mig-6*. After 16 h serum starvation, cells were stimulated with 20 ng/ml EGF for 15 min. Cell lysates were separated with SDS-PAGE followed by immunoblotting. **C.** The intensity of p-EGFR (Y1068) protein in (B) was quantified by image analysis. The data from triplicate experiments were evaluated statistically and are shown graphically. **D.** Effect of S302 status on cell growth. MDA-MB-231 cells were infected with retroviruses encoding wild type (WT), or S302A mutant Mig-6, and then treated with an siRNA for *Mig-6*. Cell proliferation assays were performed. The doubling times indicated graphically.

a

r

e

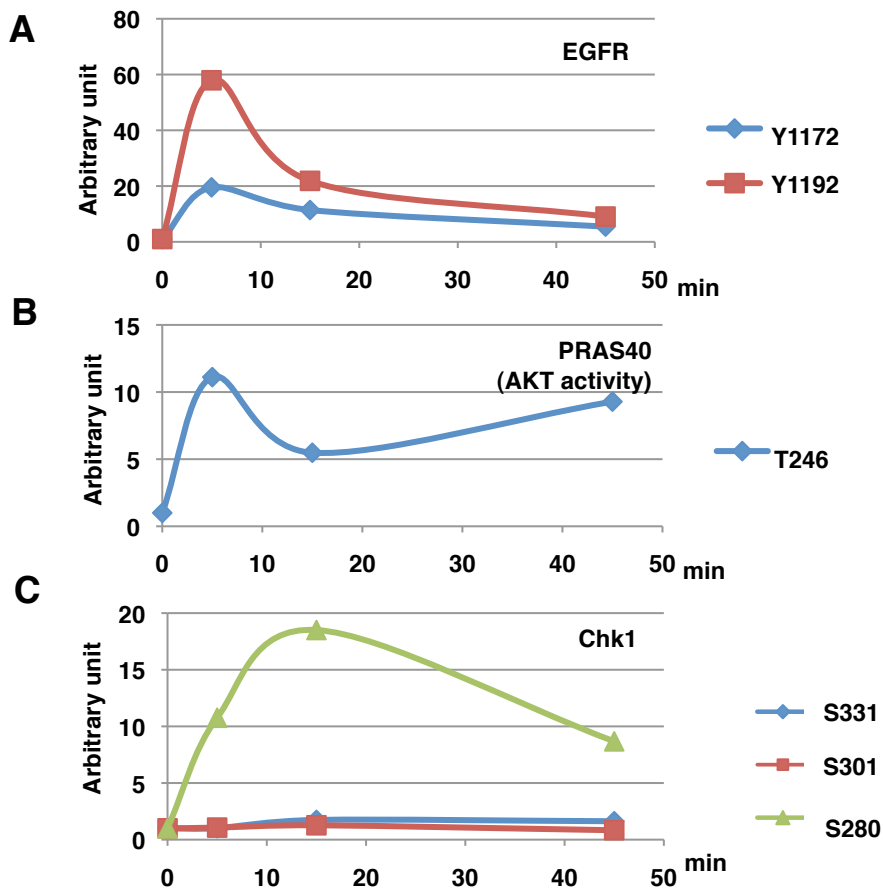

**Supplementary Figure S7. EGF-promoted phosphorylation of Chk1 at S280.**

**A–C.** EGF signaling promotes activation of PI3K/Akt and phosphorylation of Chk1 at S280. Quiescence was induced in HeLa cells by 16 h serum starvation, the cells were then treated with EGF and harvested at the indicated times. The whole cell lysates were subjected to phospho-iTRAQ (see Materials and Methods). Oscillations in the phosphorylation of EGFR (Y1172, Y1192), PRAS40 (T246), and Chk1 (S280, S301, S331) are indicated.

Exp. 2

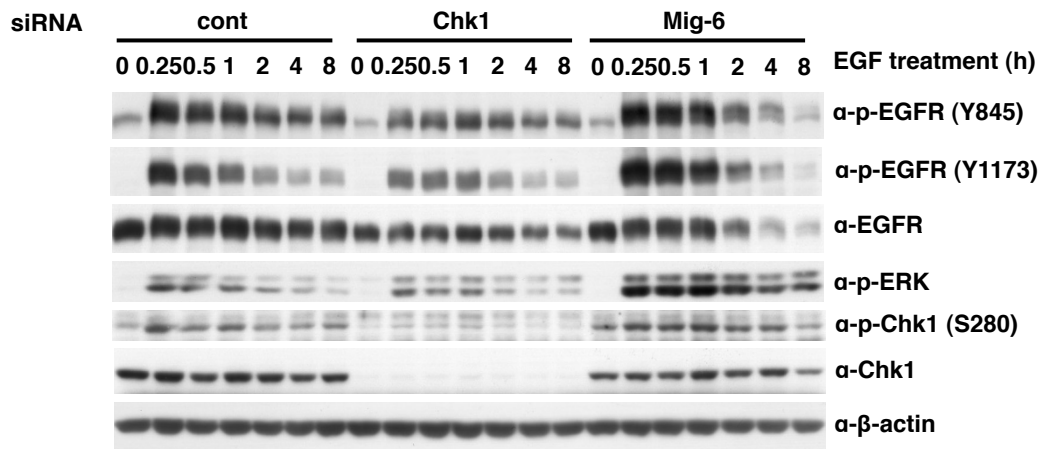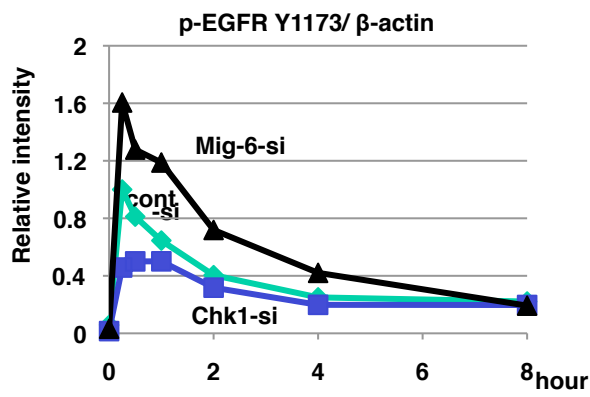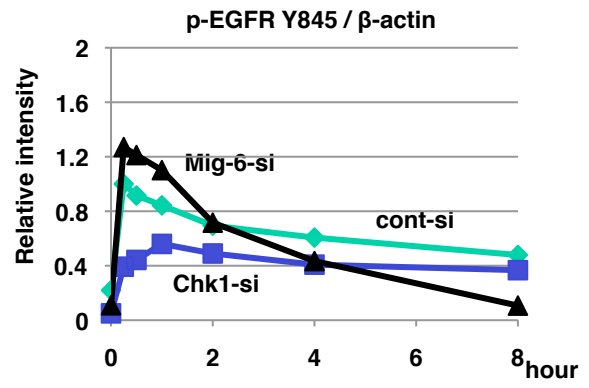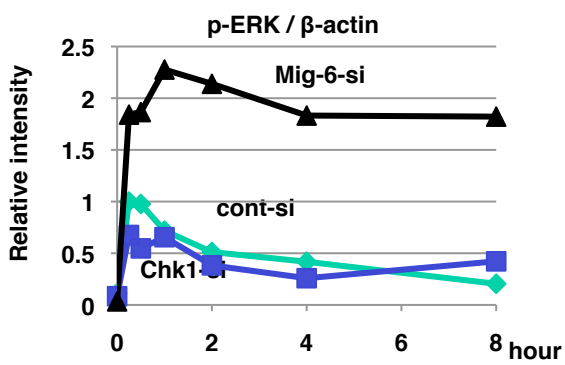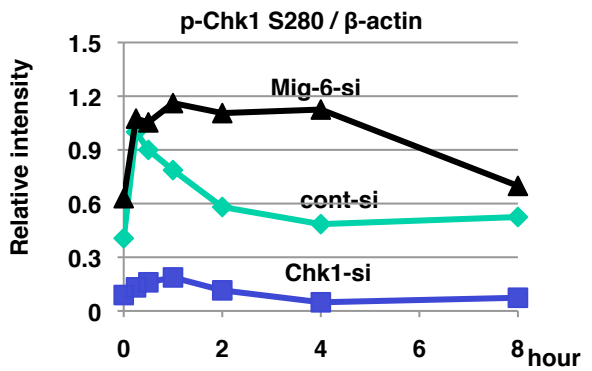

Exp. 3

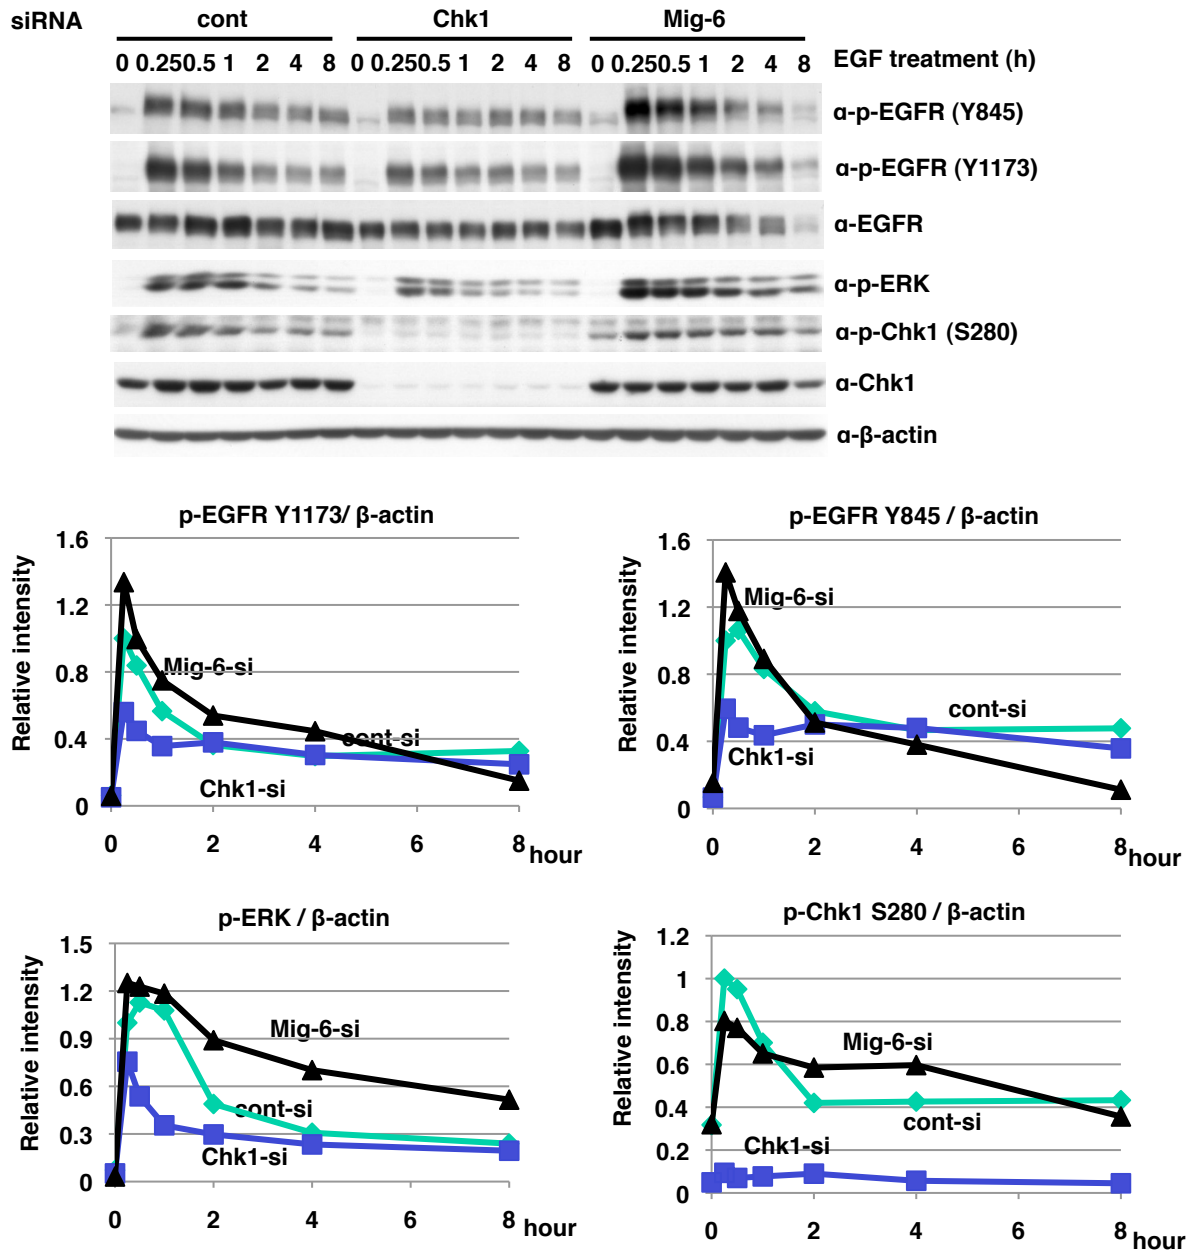

**Supplementary Figure S8. Modulation of EGFR phosphorylation in MDA-MB-231 cells depleted of Chk1.**

MDA-MB-231 cells were transfected with an siRNA for human *Chk1*(01) or *Mig-6*(01), or a control siRNA (cont). Quiescence was induced by 16 h serum starvation, then the cells were stimulated with 20 ng/ml EGF for the indicated times. Cell lysates were separated by SDS-PAGE and subjected to immunoblotting with the indicated antibodies. The experiments were repeated 3 times and indicated in Fig 6A (Exp.1) and the supplementary Fig S8 (Exp.2 and 3). The levels of phosphorylated proteins were measured and normalized to the level of β-actin.

**A**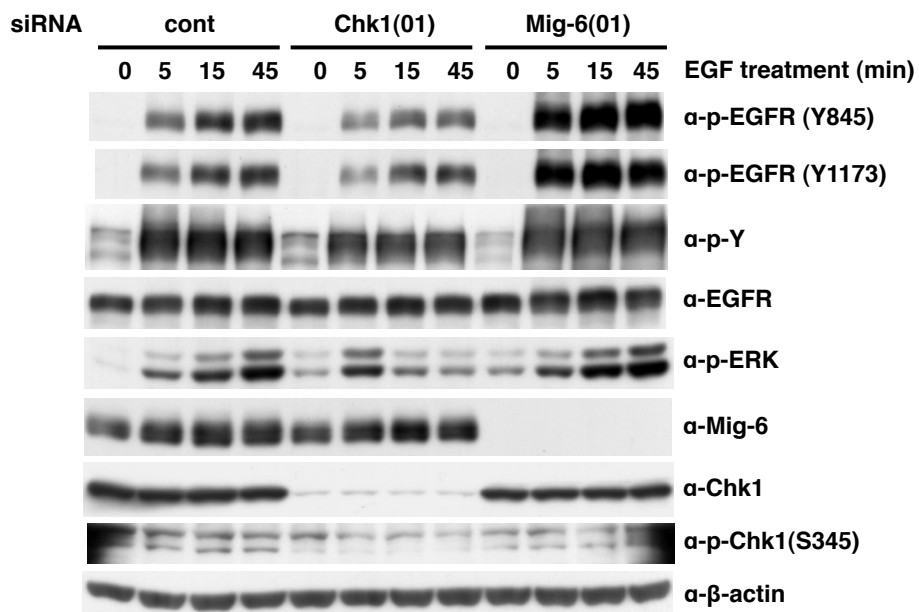**B**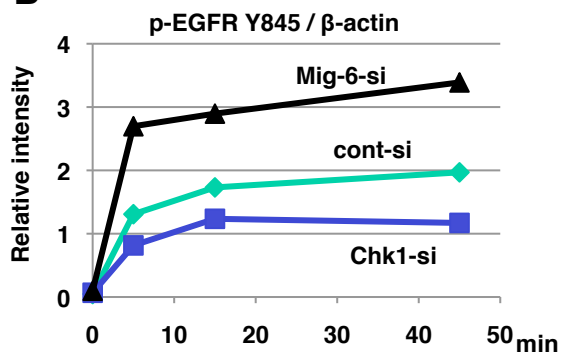**C**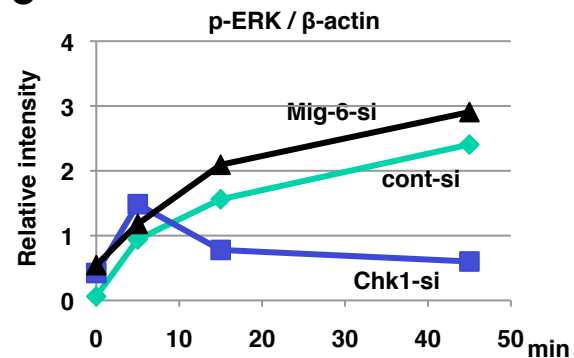

**Supplementary Figure S9. Modulation of EGFR phosphorylation in MDA-MB-231 cells depleted of Chk1.**

**A.** MDA-MB-231 cells were transfected with an siRNA for human *Chk1*(01) or *Mig-6*(01), or a control siRNA (cont). Quiescence was induced by 16 h serum starvation, then the cells were stimulated with 20 ng/ml EGF for the indicated times. Cell lysates were separated by SDS-PAGE and subjected to immunoblotting with the indicated antibodies. **B, C.** Quantification of the levels of phosphorylated proteins in (A) were normalized to the level of β-actin.

**A**

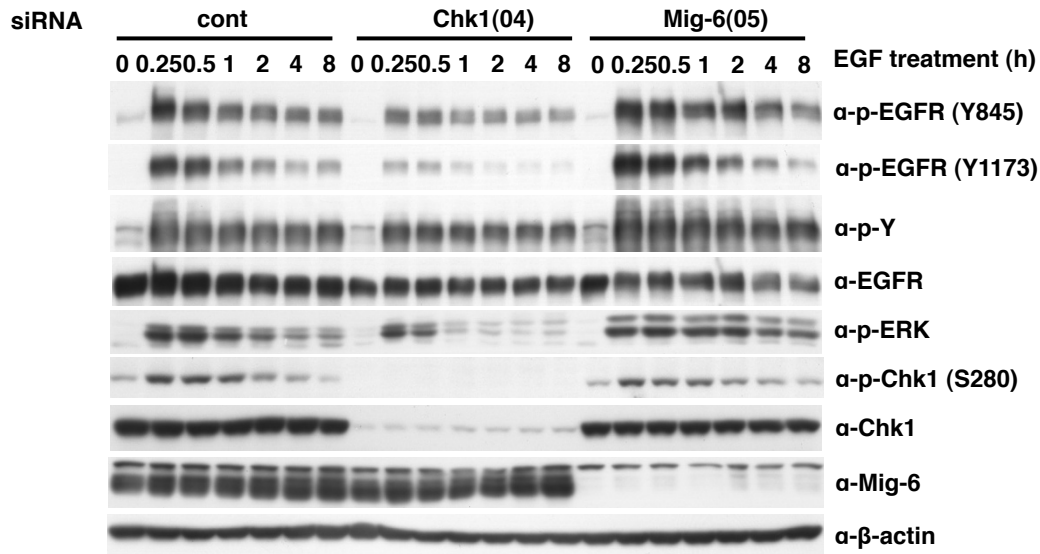

**B**

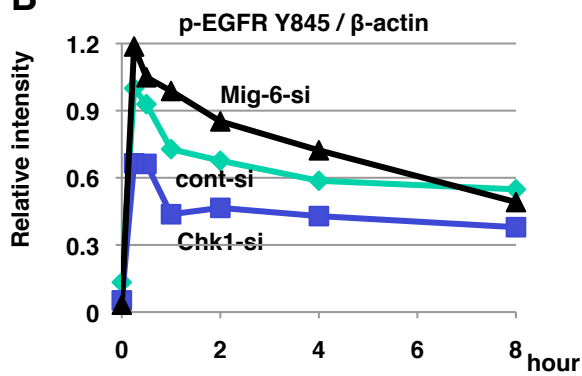

**C**

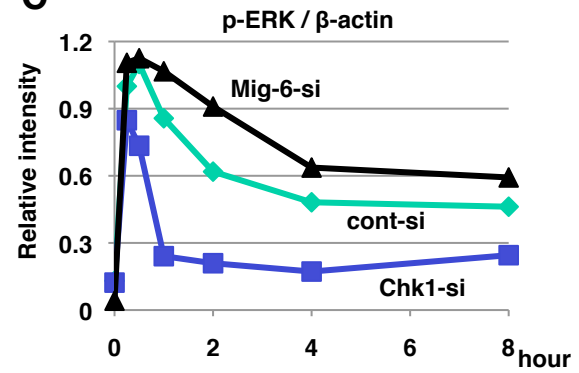

**Supplementary Figure S10. Modulation of EGFR phosphorylation in MDA-MB-231 cells in early stage of EGF stimulation.**

**A.** MDA-MB-231 cells were transfected with an siRNA for human *Chk1*(04) or *Mig-6*(05), or a control siRNA (cont), serum starved for 16 h, then stimulated with 20 ng/ml EGF for 5 min, 15 min, or 45 min. The cell lysates were analyzed by immunoblotting with the indicated antibodies. **B,** **C.** Quantification of the levels of phosphorylated proteins in (A) were normalized to the level of β-actin.

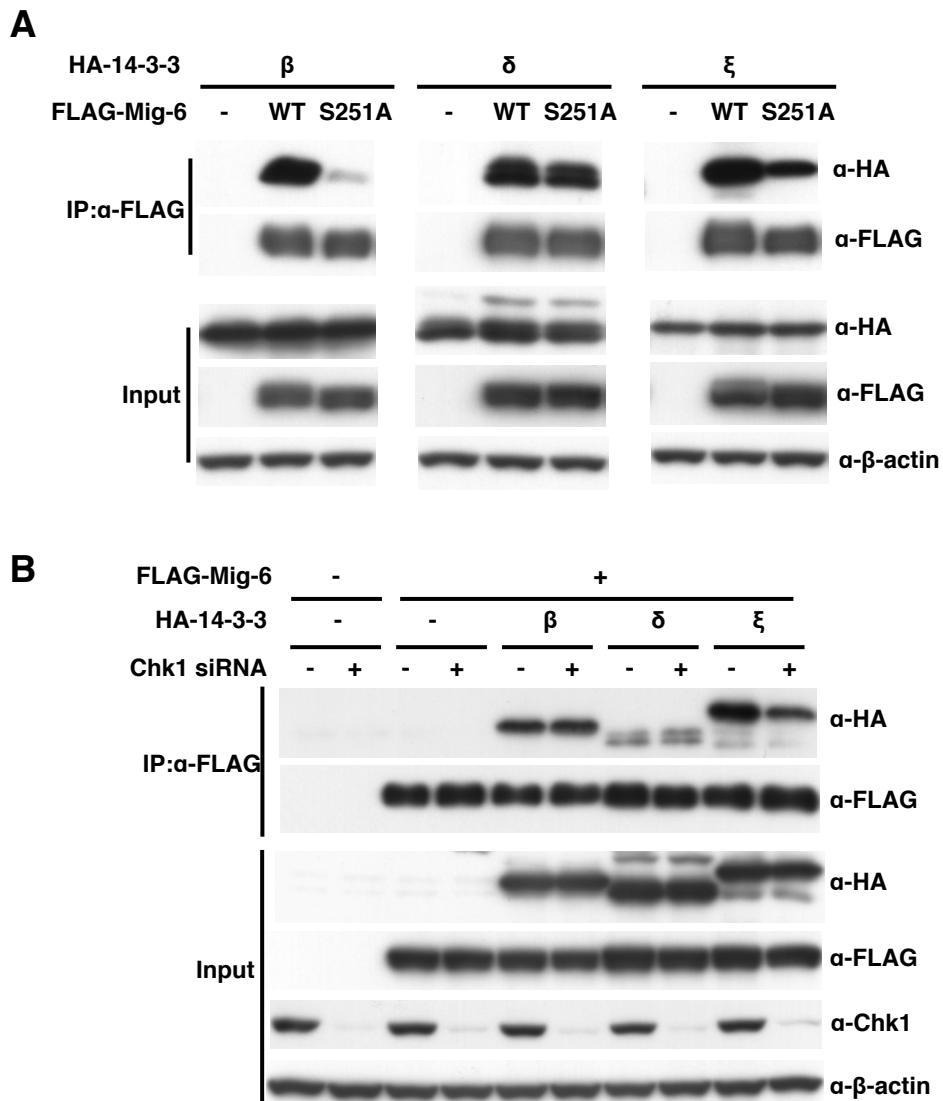

**Supplementary Figure S11. Phosphorylation of Mig-6 at S251 affects on binding of Mig-6 to 14-3-3.**

**A.** HA-14-3-3  $\xi$ ,  $\beta$ , or  $\delta$ , were co-expressed with FLAG-Mig-6 in HEK293 cells. The cell lysates were subjected to immunoprecipitation with anti-FLAG antibody, followed by immunoblotting with anti-HA antibody. **B.** Depletion of Chk1 inhibited binding of Mig-6 to 14-3-3  $\xi$ . HA-14-3-3  $\xi$ ,  $\beta$ , or  $\delta$  were co-expressed with FLAG-Mig-6 in HEK293 cells. Then Chk1 was depleted by siRNA transfection. The cell lysates were immunoprecipitated with anti-FLAG antibody and immunoblotted with the indicated antibodies.
