# Supplementary material
Source: PubMed Central journal article supplement (PMC3364749)

Figure 1C

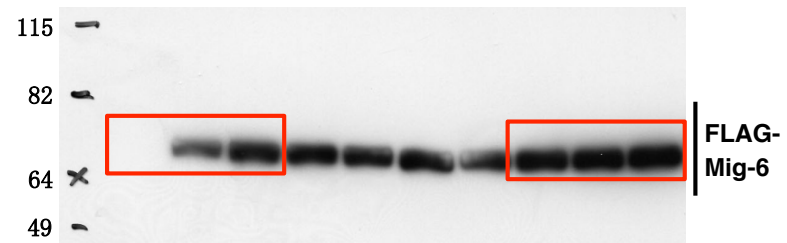

Figure 1D

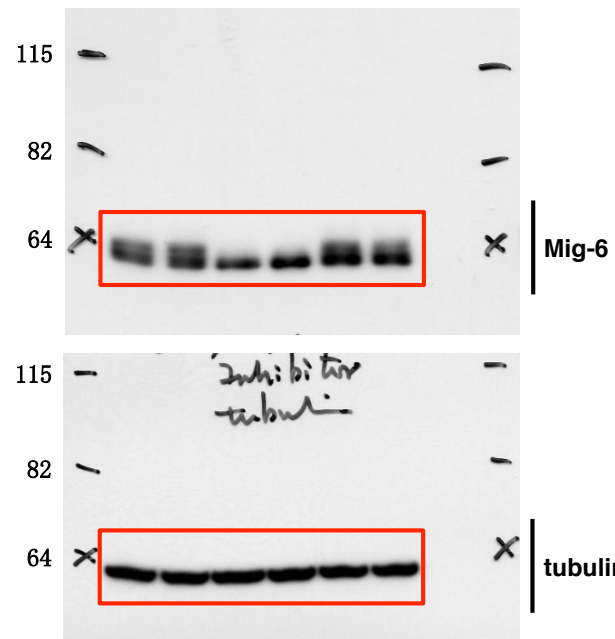

Supplement: emboj201288s2.pdf [file emboj201288s2.pdf]

Figure 3B

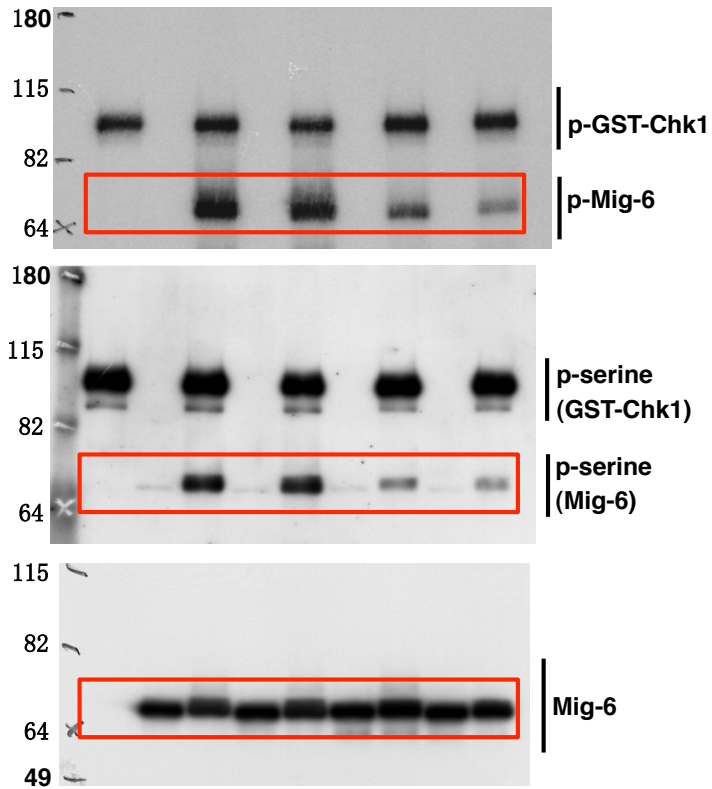

Figure 3C

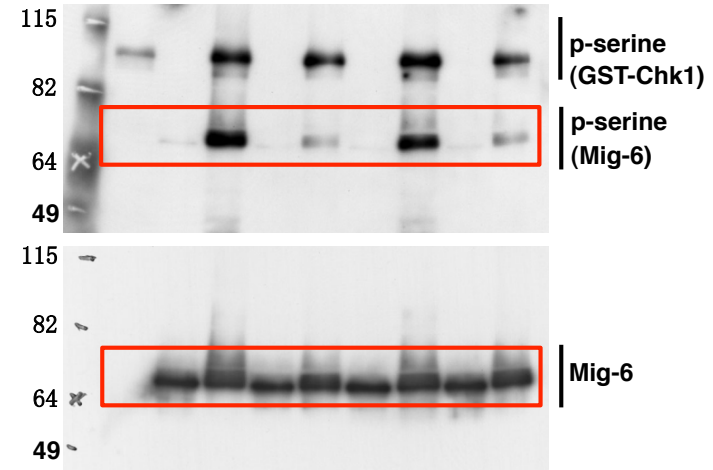

Figure 3D

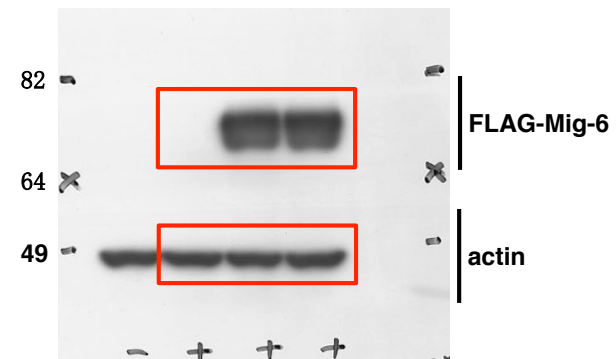

Supplement: emboj201288s4.pdf [file emboj201288s4.pdf]

Figure 4C

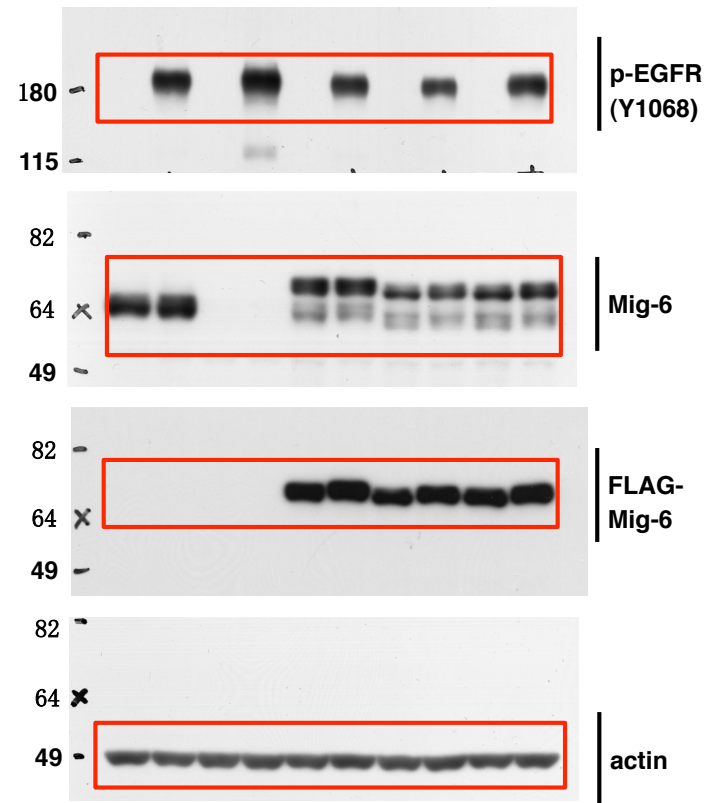

Supplement: emboj201288s5.pdf [file emboj201288s5.pdf]

Figure 5A

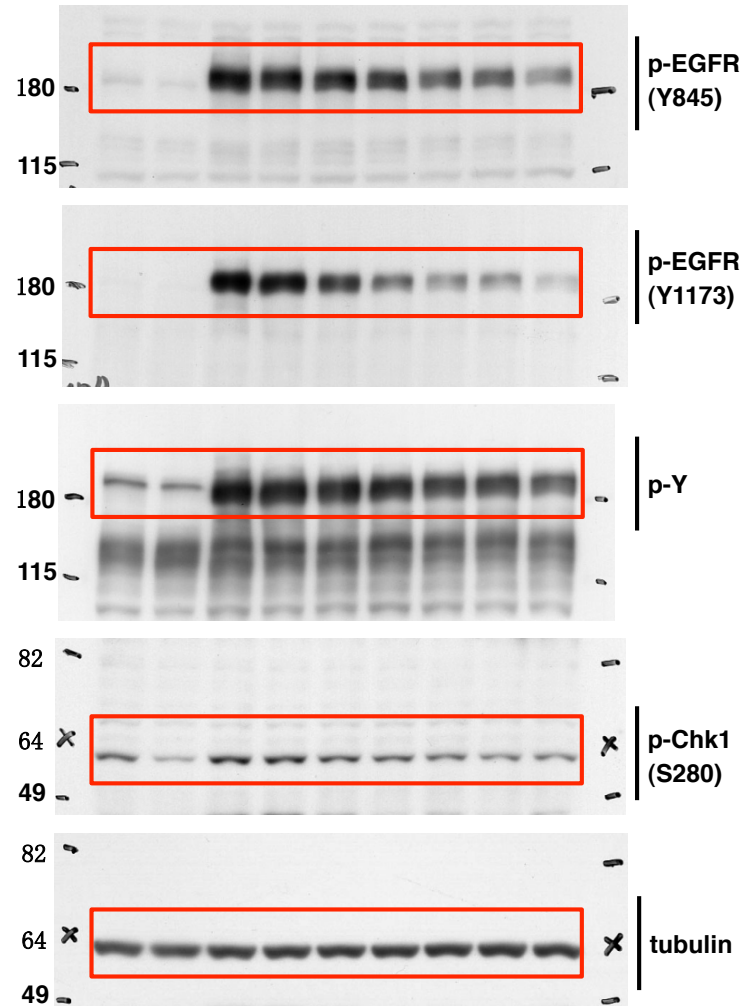

Figure 5B

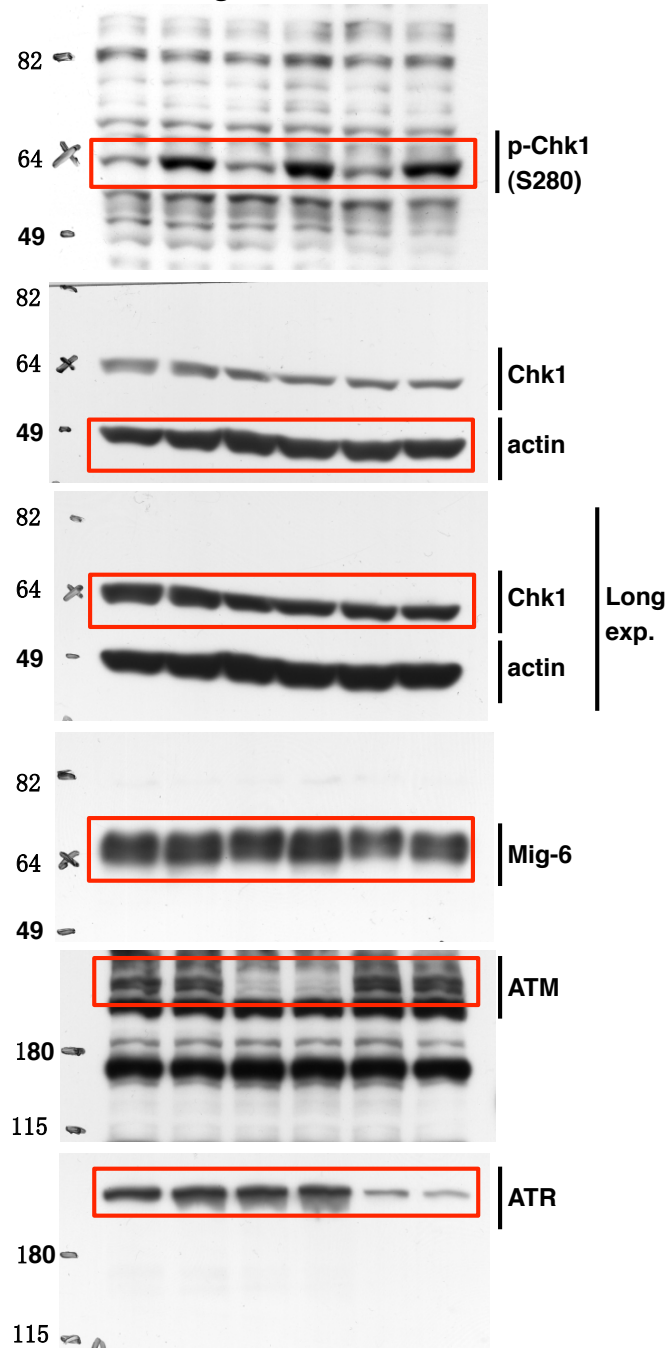

Figure 5C

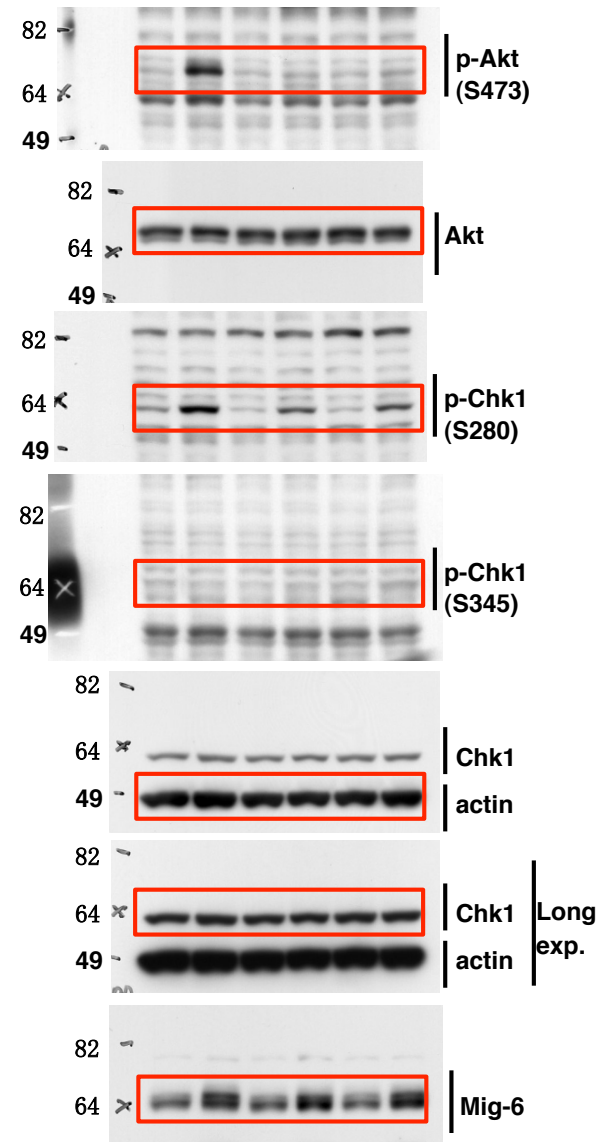

Figure 5D

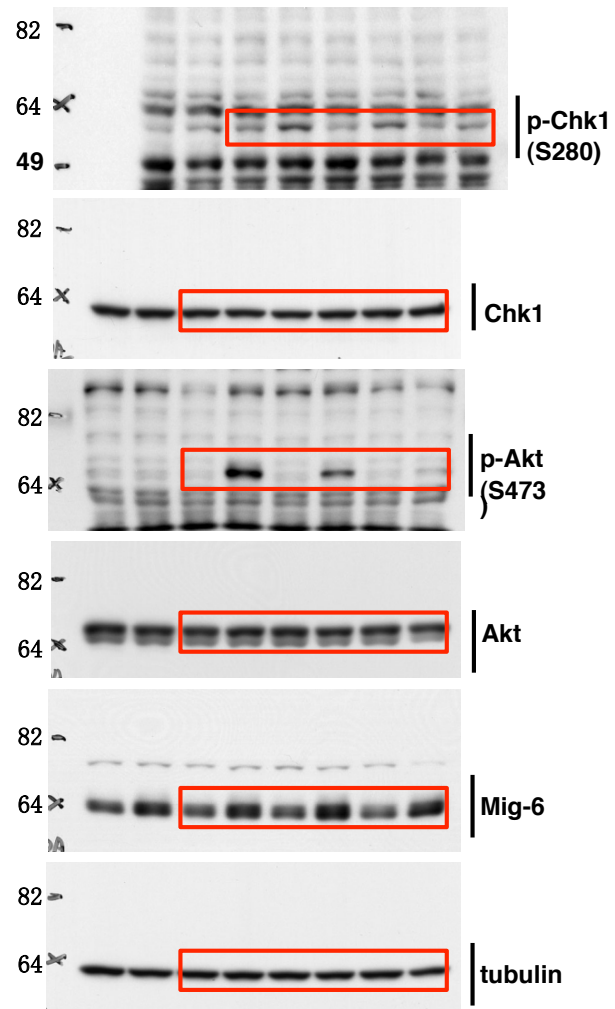

Figure 5E

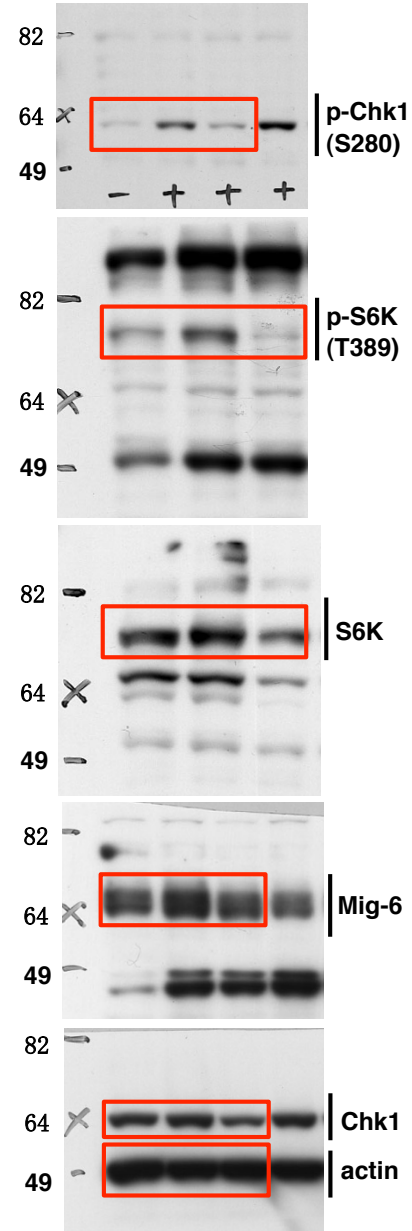

Figure 5F

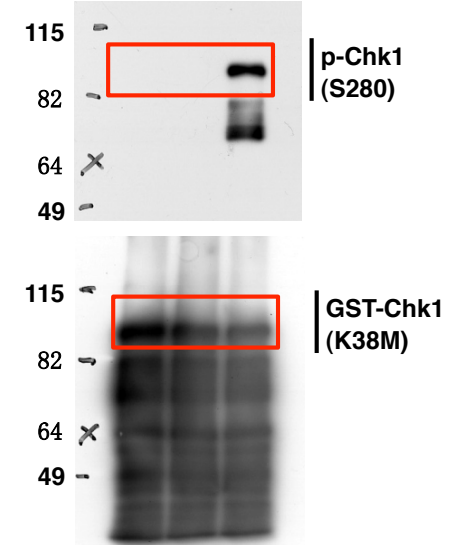

Supplement: emboj201288s6.pdf [file emboj201288s6.pdf]

Figure 6A

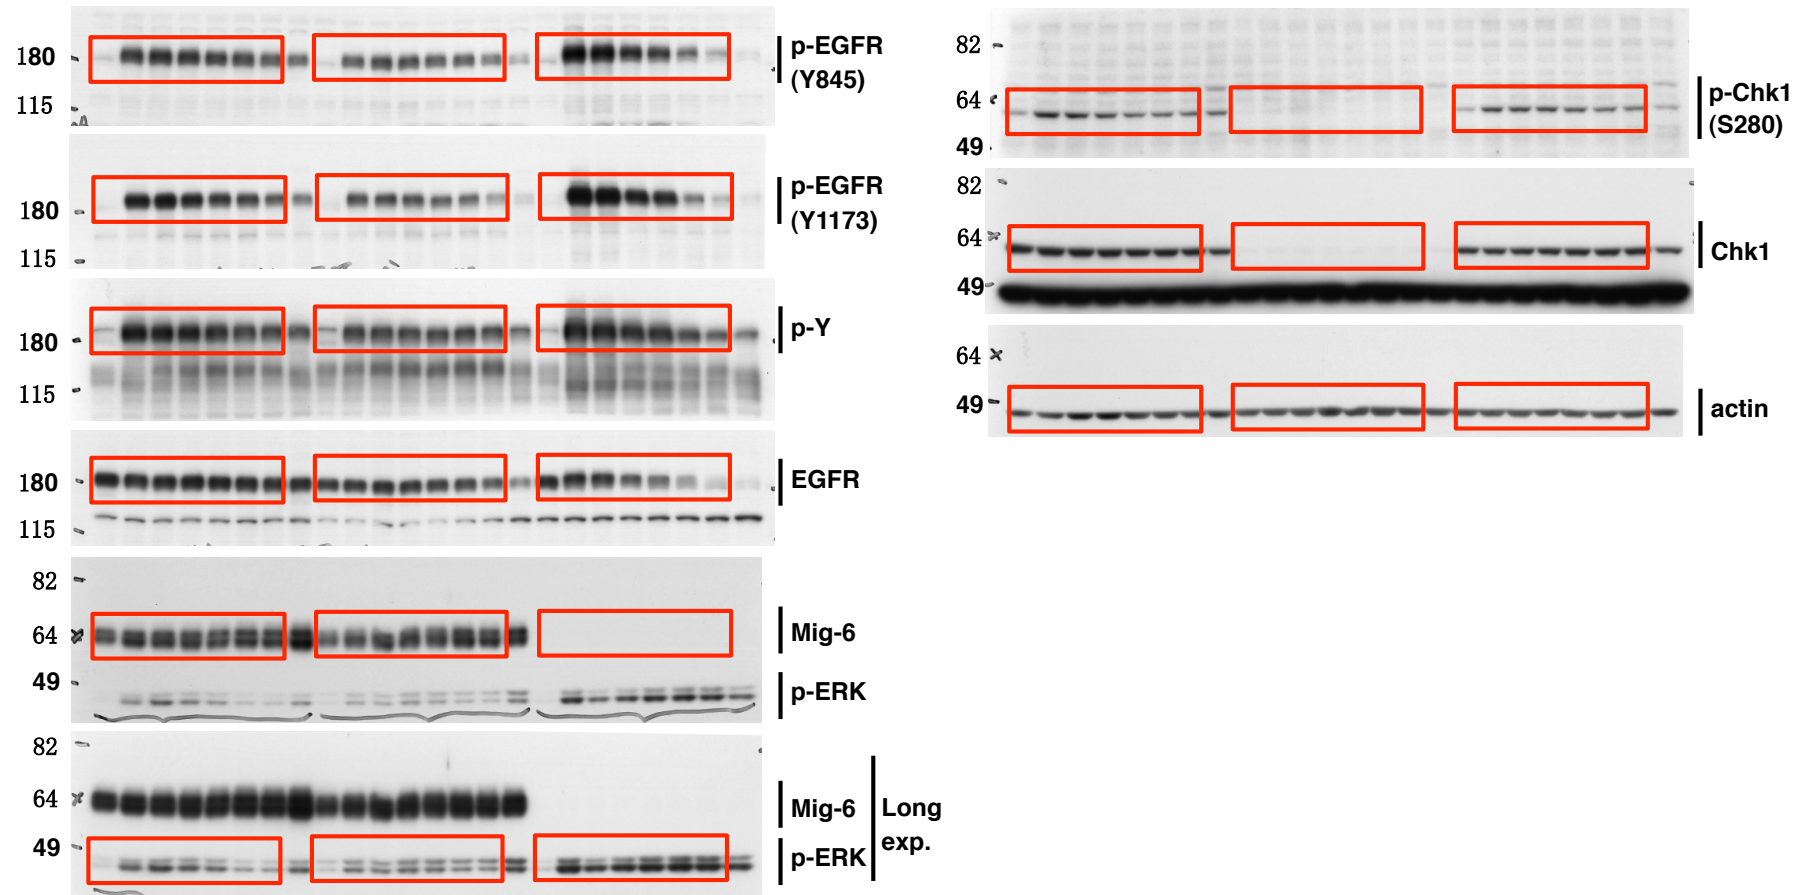

Supplement: emboj201288s7.pdf [file emboj201288s7.pdf]

Figure 7A

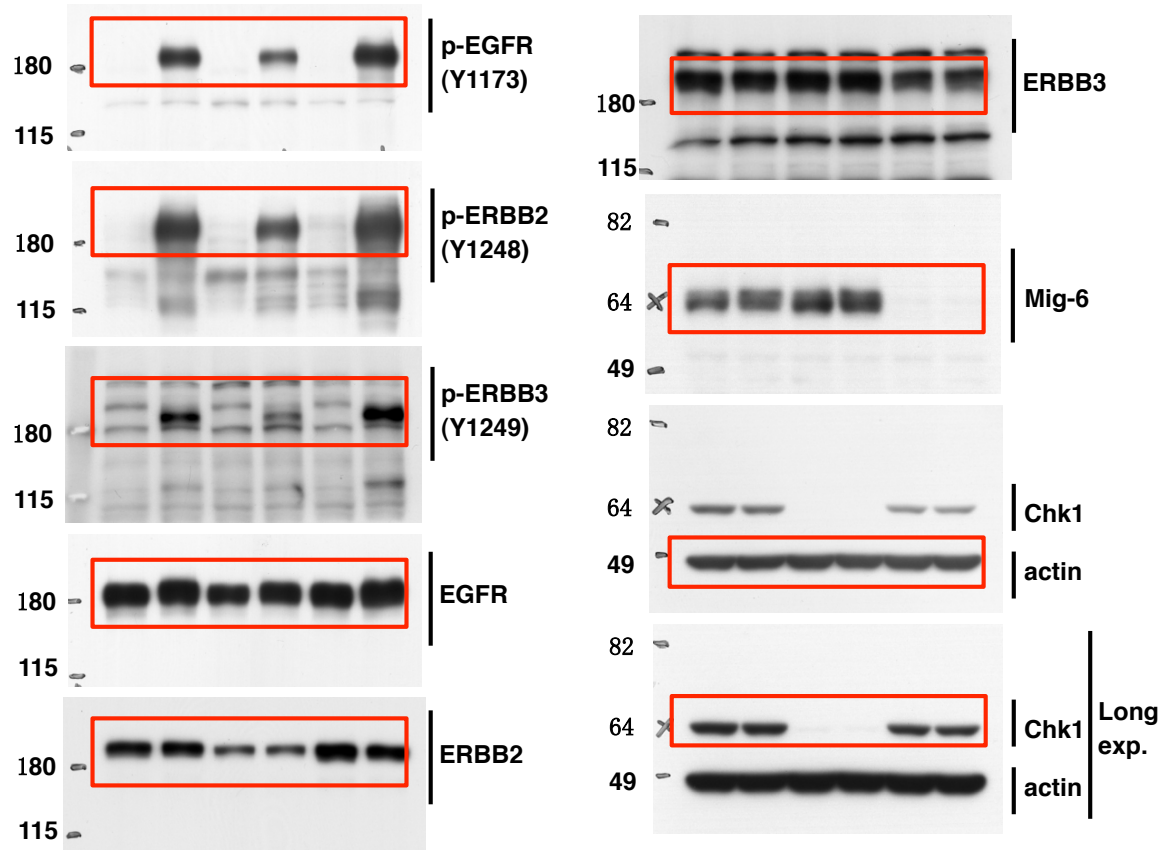

Figure 7B

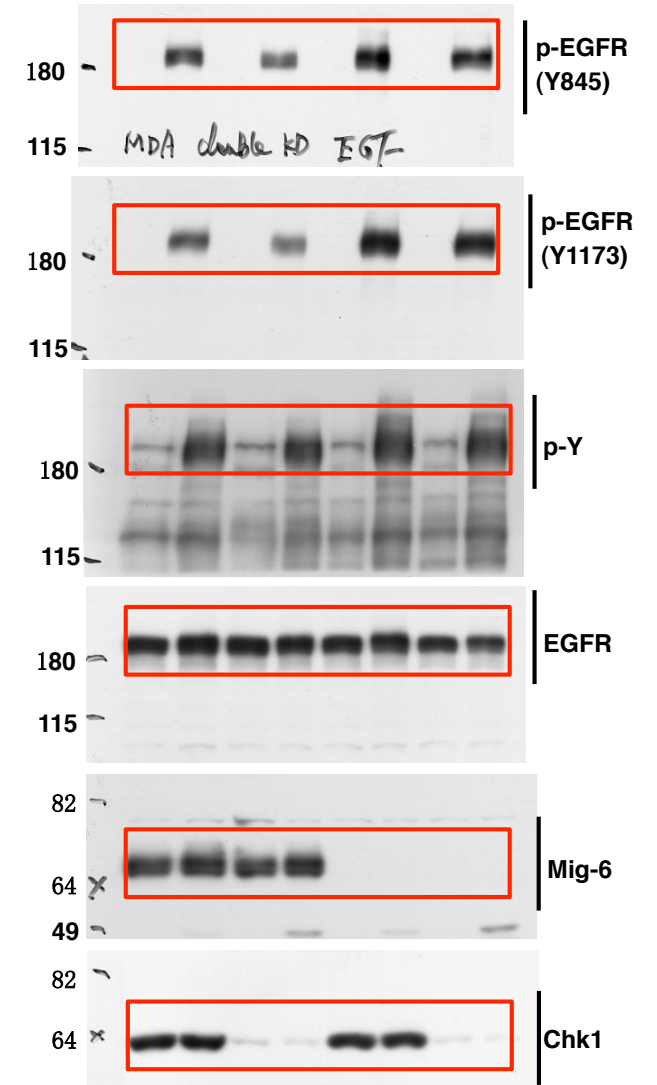

Supplement: emboj201288s8.pdf [file emboj201288s8.pdf]
